# Table of Contents

## EDITORIAL UPDATE

**Next Steps for *Vision and Change*: Moving from Setting the Vision to Change**  
 Erin L. Dolan . . . . . 201–202

## LETTER TO THE EDITOR

**Integrating Genomics Research throughout the Undergraduate Curriculum: A Collection of Inquiry-Based Genomics Lab Modules**  
 Lois M. Banta, Erica J. Crespi, Ross H. Nehm, Jodi A. Schwarz, Susan Singer, Cathryn A. Manduca, Eliot C. Bush, Elizabeth Collins, Cara M. Constance, Derek Dean, David Esteban, Sean Fox, John McDaris, Carol Ann Paul, Ginny Quinan, Kathleen M. Raley-Susman, Marc L. Smith, Christopher S. Wallace, Ginger S. Withers, and Lynn Caporale . . . . . 203–208

## FEATURES

***Approaches to Biology Teaching and Learning***  
**Common Origins of Diverse Misconceptions: Cognitive Principles and the Development of Biology Thinking**  
 John D. Coley and Kimberly D. Tanner . . . . . 209–215

***From the National Science Foundation***  
**Teacher Preparation: One Key to Unlocking the Gate to STEM Literacy**  
 Mary Lee S. Ledbetter . . . . . 216–220

***Current Insights***  
**Recent Research in Science Teaching and Learning**  
 Deborah Allen . . . . . 221–225

***WWW.Life Sciences Education***  
**Cell Biology Apps for Apple Devices**  
 Louisa A. Stark . . . . . 226–230

***Book Review***  
**The Rubrics Game**  
 José Vázquez . . . . . 231–232

***Book Review***  
**Teaching Skeptical Inquiry**  
 Marshall D. Sundberg . . . . . 233–234

***Book Review***  
**Back to the Evolutionary Future**  
 José Vázquez . . . . . 235–236

***Book Review***  
**Teacher, Know Thyself**  
 Jennifer E. Round . . . . . 237–238

## ESSAY

**Moving beyond GK–12**  
 J. A. Ufnar, Susan Kuner, and V. L. Shepherd . . . . . 239–247

## ARTICLES

**Biology Undergraduates’ Misconceptions about Genetic Drift**  
 T. M. Andrews, R. M. Price, L. S. Mead, T. L. McElhinny, A. Thanukos, K. E. Perez, C. F. Herreid, D. R. Terry, and P. P. Lemons . . . . . 248–259

|                                                                                                                                                    |         |
|----------------------------------------------------------------------------------------------------------------------------------------------------|---------|
| <b>The Benefits of Multi-Year Research Experiences: Differences in Novice and Experienced Students' Reported Gains from Undergraduate Research</b> |         |
| Heather Thiry, Timothy J. Weston, Sandra L. Laursen, and Anne-Barrie Hunter . . . . .                                                              | 260–272 |
| <b>Facilitating Long-Term Changes in Student Approaches to Learning Science</b>                                                                    |         |
| Brian J. Buchwitz, Catharine H. Beyer, Jon E. Peterson, Emile Pitre, Nevena Lalic, Paul D. Sampson, and Barbara T. Wakimoto . . . . .              | 273–282 |
| <b>What Are They Thinking? Automated Analysis of Student Writing about Acid–Base Chemistry in Introductory Biology</b>                             |         |
| Kevin C. Haudek, Luanna B. Prevost, Rosa A. Moscarella, John Merrill, and Mark Urban-Lurain . . . . .                                              | 283–293 |
| <b>Multiple-Choice Exams: An Obstacle for Higher-Level Thinking in Introductory Science Classes</b>                                                |         |
| Kathrin F. Stanger-Hall . . . . .                                                                                                                  | 294–306 |
| <b>An Educational Intervention Designed to Increase Women's Leadership Self-Efficacy</b>                                                           |         |
| Carol Isaac, Anna Kaatz, Barbara Lee, and Molly Carnes . . . . .                                                                                   | 307–322 |
| <b>Student Learning Outcomes and Attitudes When Biotechnology Lab Partners Are of Different Academic Levels</b>                                    |         |
| Heather B. Miller, D. Scott Witherow, and Susan Carson . . . . .                                                                                   | 323–332 |

*On the Cover*

Recommendations from the National Research Council (2005, *America's Lab Report*) were used as the design framework for a series of inquiry-based, integrated instructional units (I<sup>3</sup>Us) focused on introducing genomics and bioinformatics into commonly taught courses at all levels of the undergraduate curriculum. In a grassroots project that spanned three years, 16 faculty members from eight institutions developed and refined multiweek curricular modules that require students to formulate questions, design their own investigations, and construct scientific arguments and explanations based on data they have gathered and analyzed. Each of the peer-reviewed I<sup>3</sup>Us is based on vetted design principles with documented educational value: 1) they have clear pedagogical objectives; 2) they are integrated with lessons taught in the lecture; 3) they are designed to teach science content as well as process; and 4) they require student reflection and discussion. The Letter to the Editor by Banta and colleagues (page 203) introduces a web portal for the collection of genomics lab modules, including extensive links to downloadable teaching materials that can be customized by educators for courses from introductory biology through advanced courses in neurobiology, microbiology, bioinformatics, and plant genetics. Illustration by Erica Crespi and Jodi Schwarz.
